# Supplementary material for: Potential physiological roles of the 31/32-nucleotide Y4-RNA fragment in human plasma
Source: PubMed Central journal article supplement — Noncoding RNA Res. 2019 Nov 22;4(4):135–40. doi: 10.1016/j.ncrna.2019.11.003 (PMC7012775; doi:10.1016/j.ncrna.2019.11.003), 2019-11-22
Supplement: mmc1.pdf [file mmc1.pdf]

A

HL60

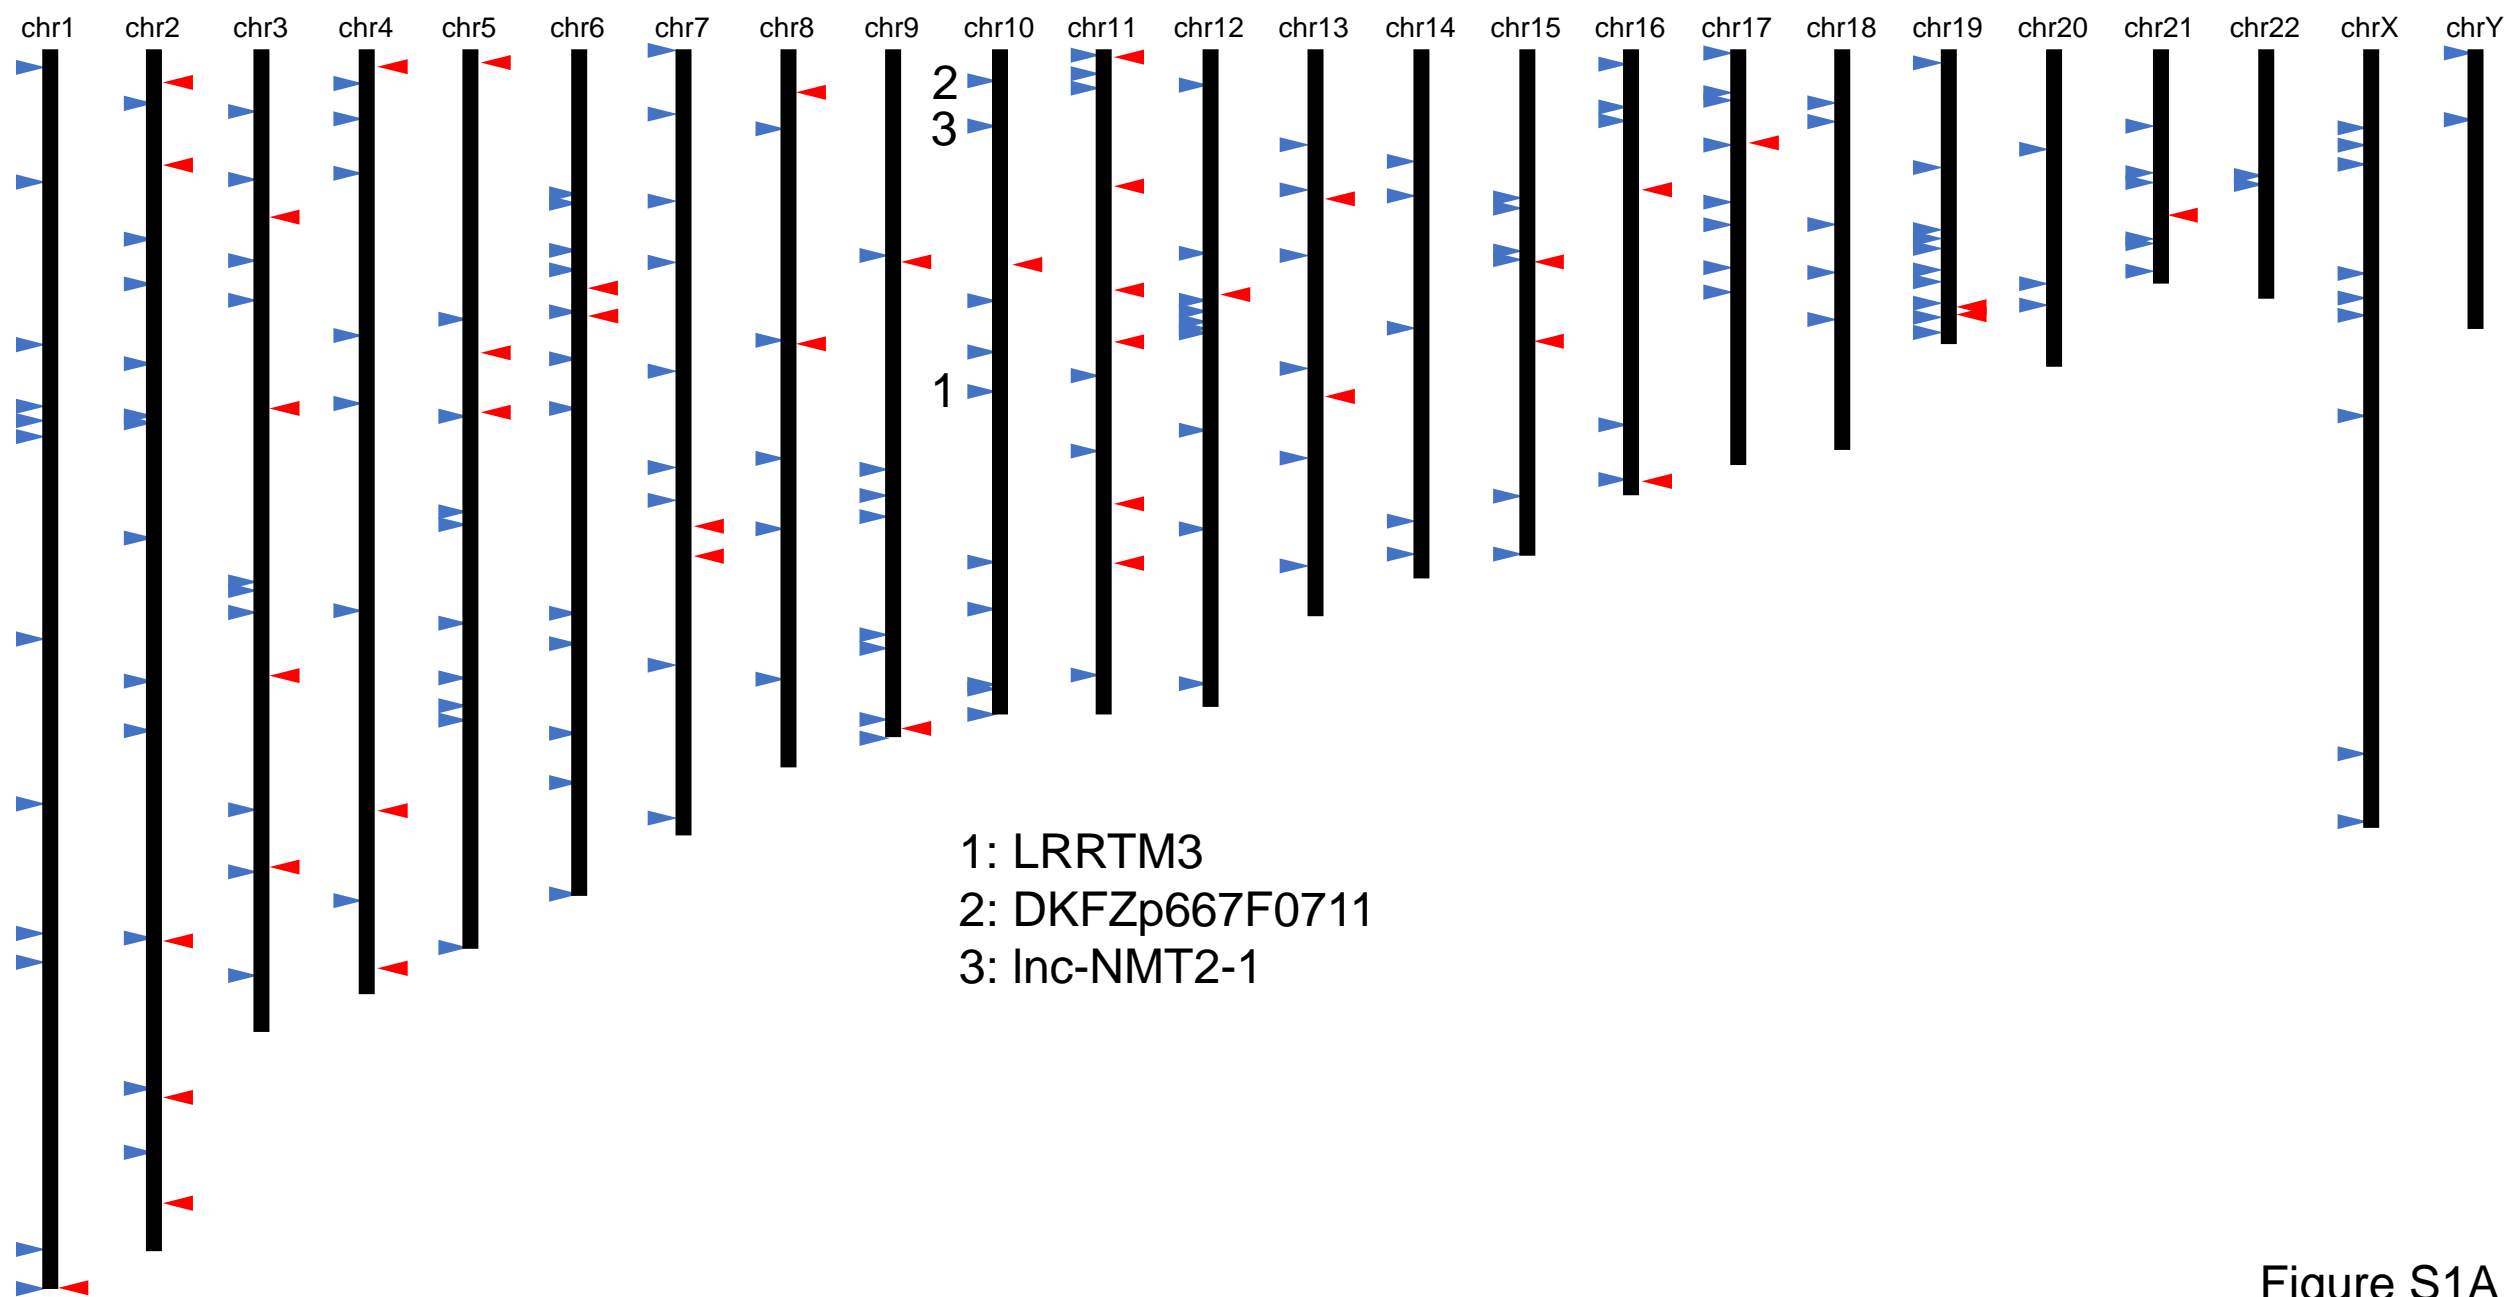

Figure S1A

**B****RPMI-8226**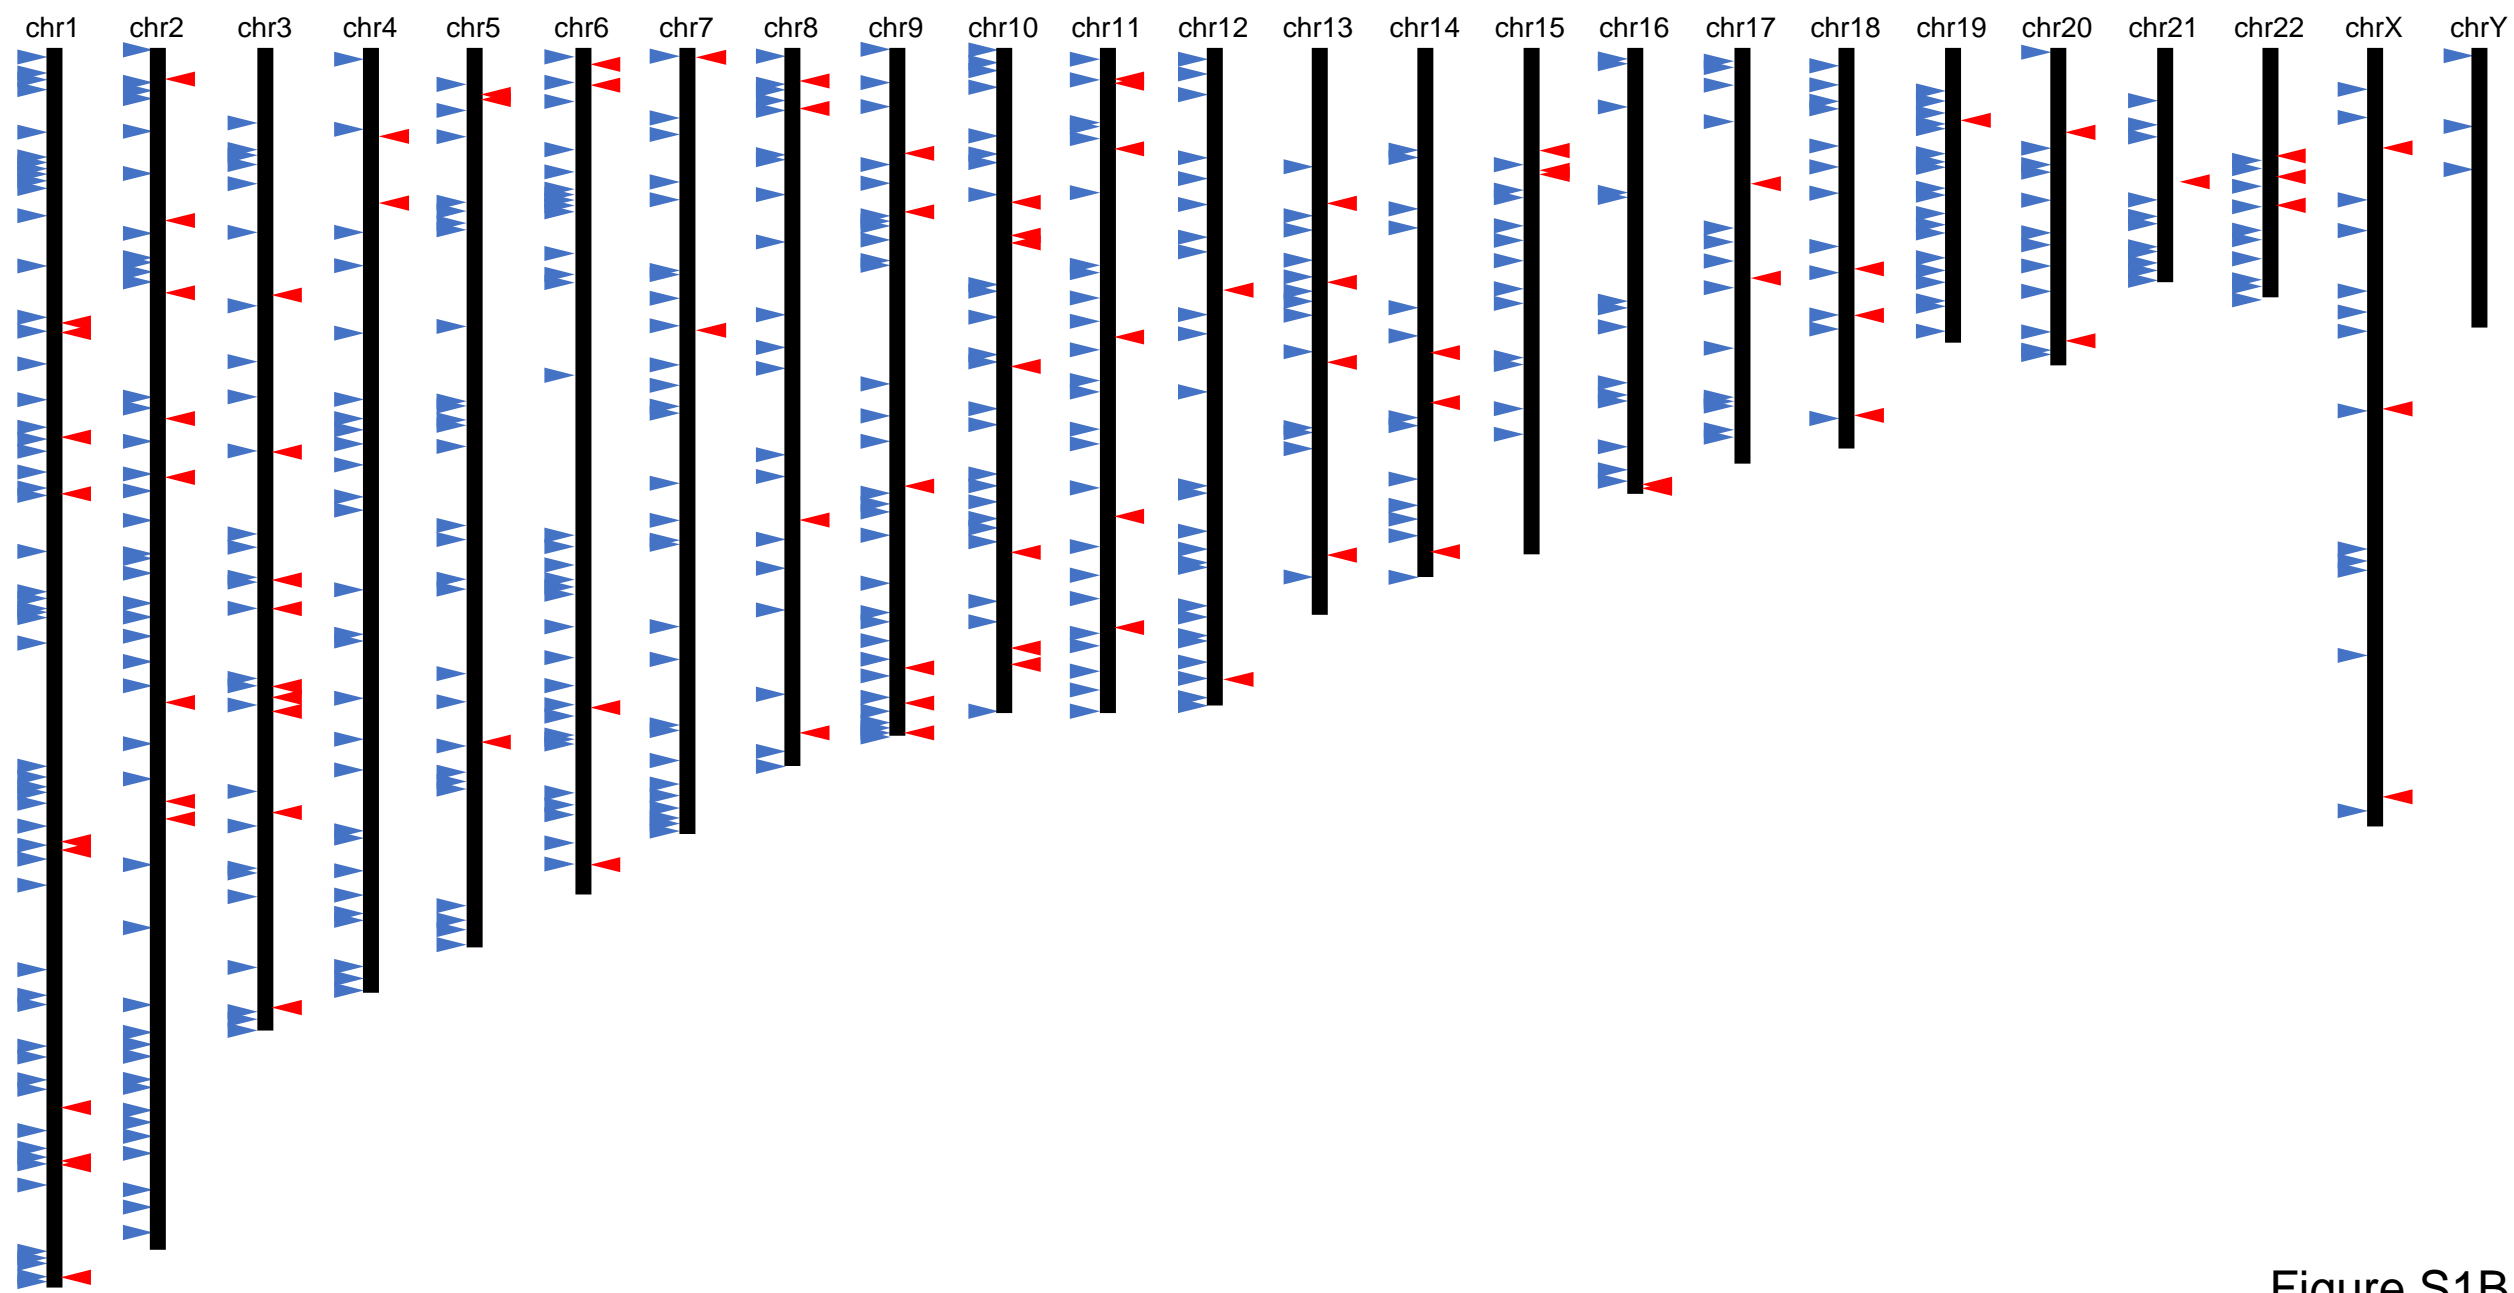

Figure S1B

**C****HEK2993**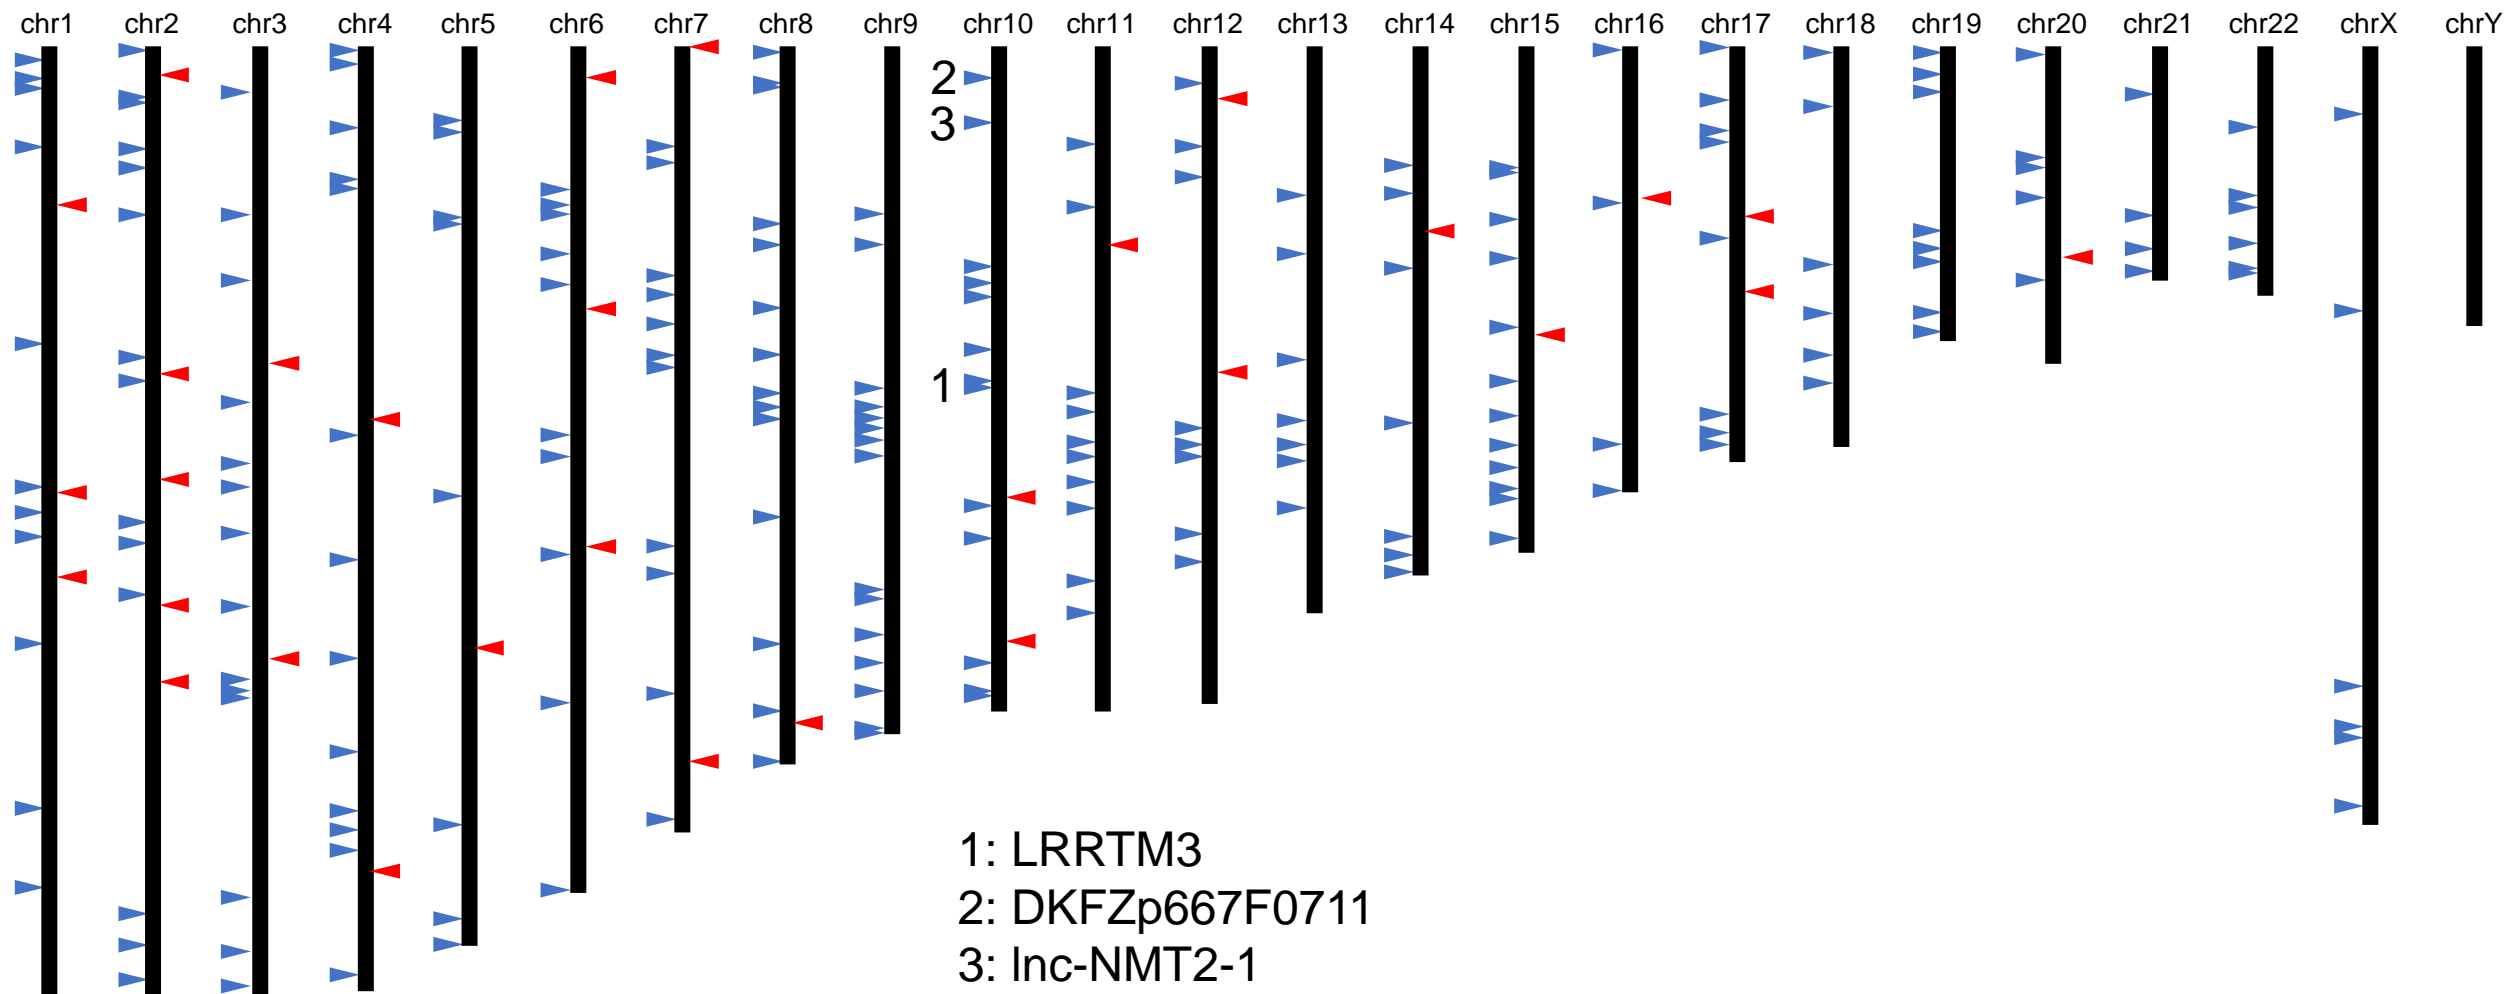

Figure S1C

**Fig. S1.** Chromosome map. Chromosomal positions of the genes upregulated (on the left side) and downregulated (on the right side) by the Y4RNAfr treatment are denoted by arrowheads with respect to HL60 (A), RPMI-8226 (B), and HEK293 (C) cells. The positions of the genes LRRTM3, DKFZp667F0711, and lnc-NMT2-1 on chromosome 10 are indicated by the numbers 1–3, respectively.

# A549

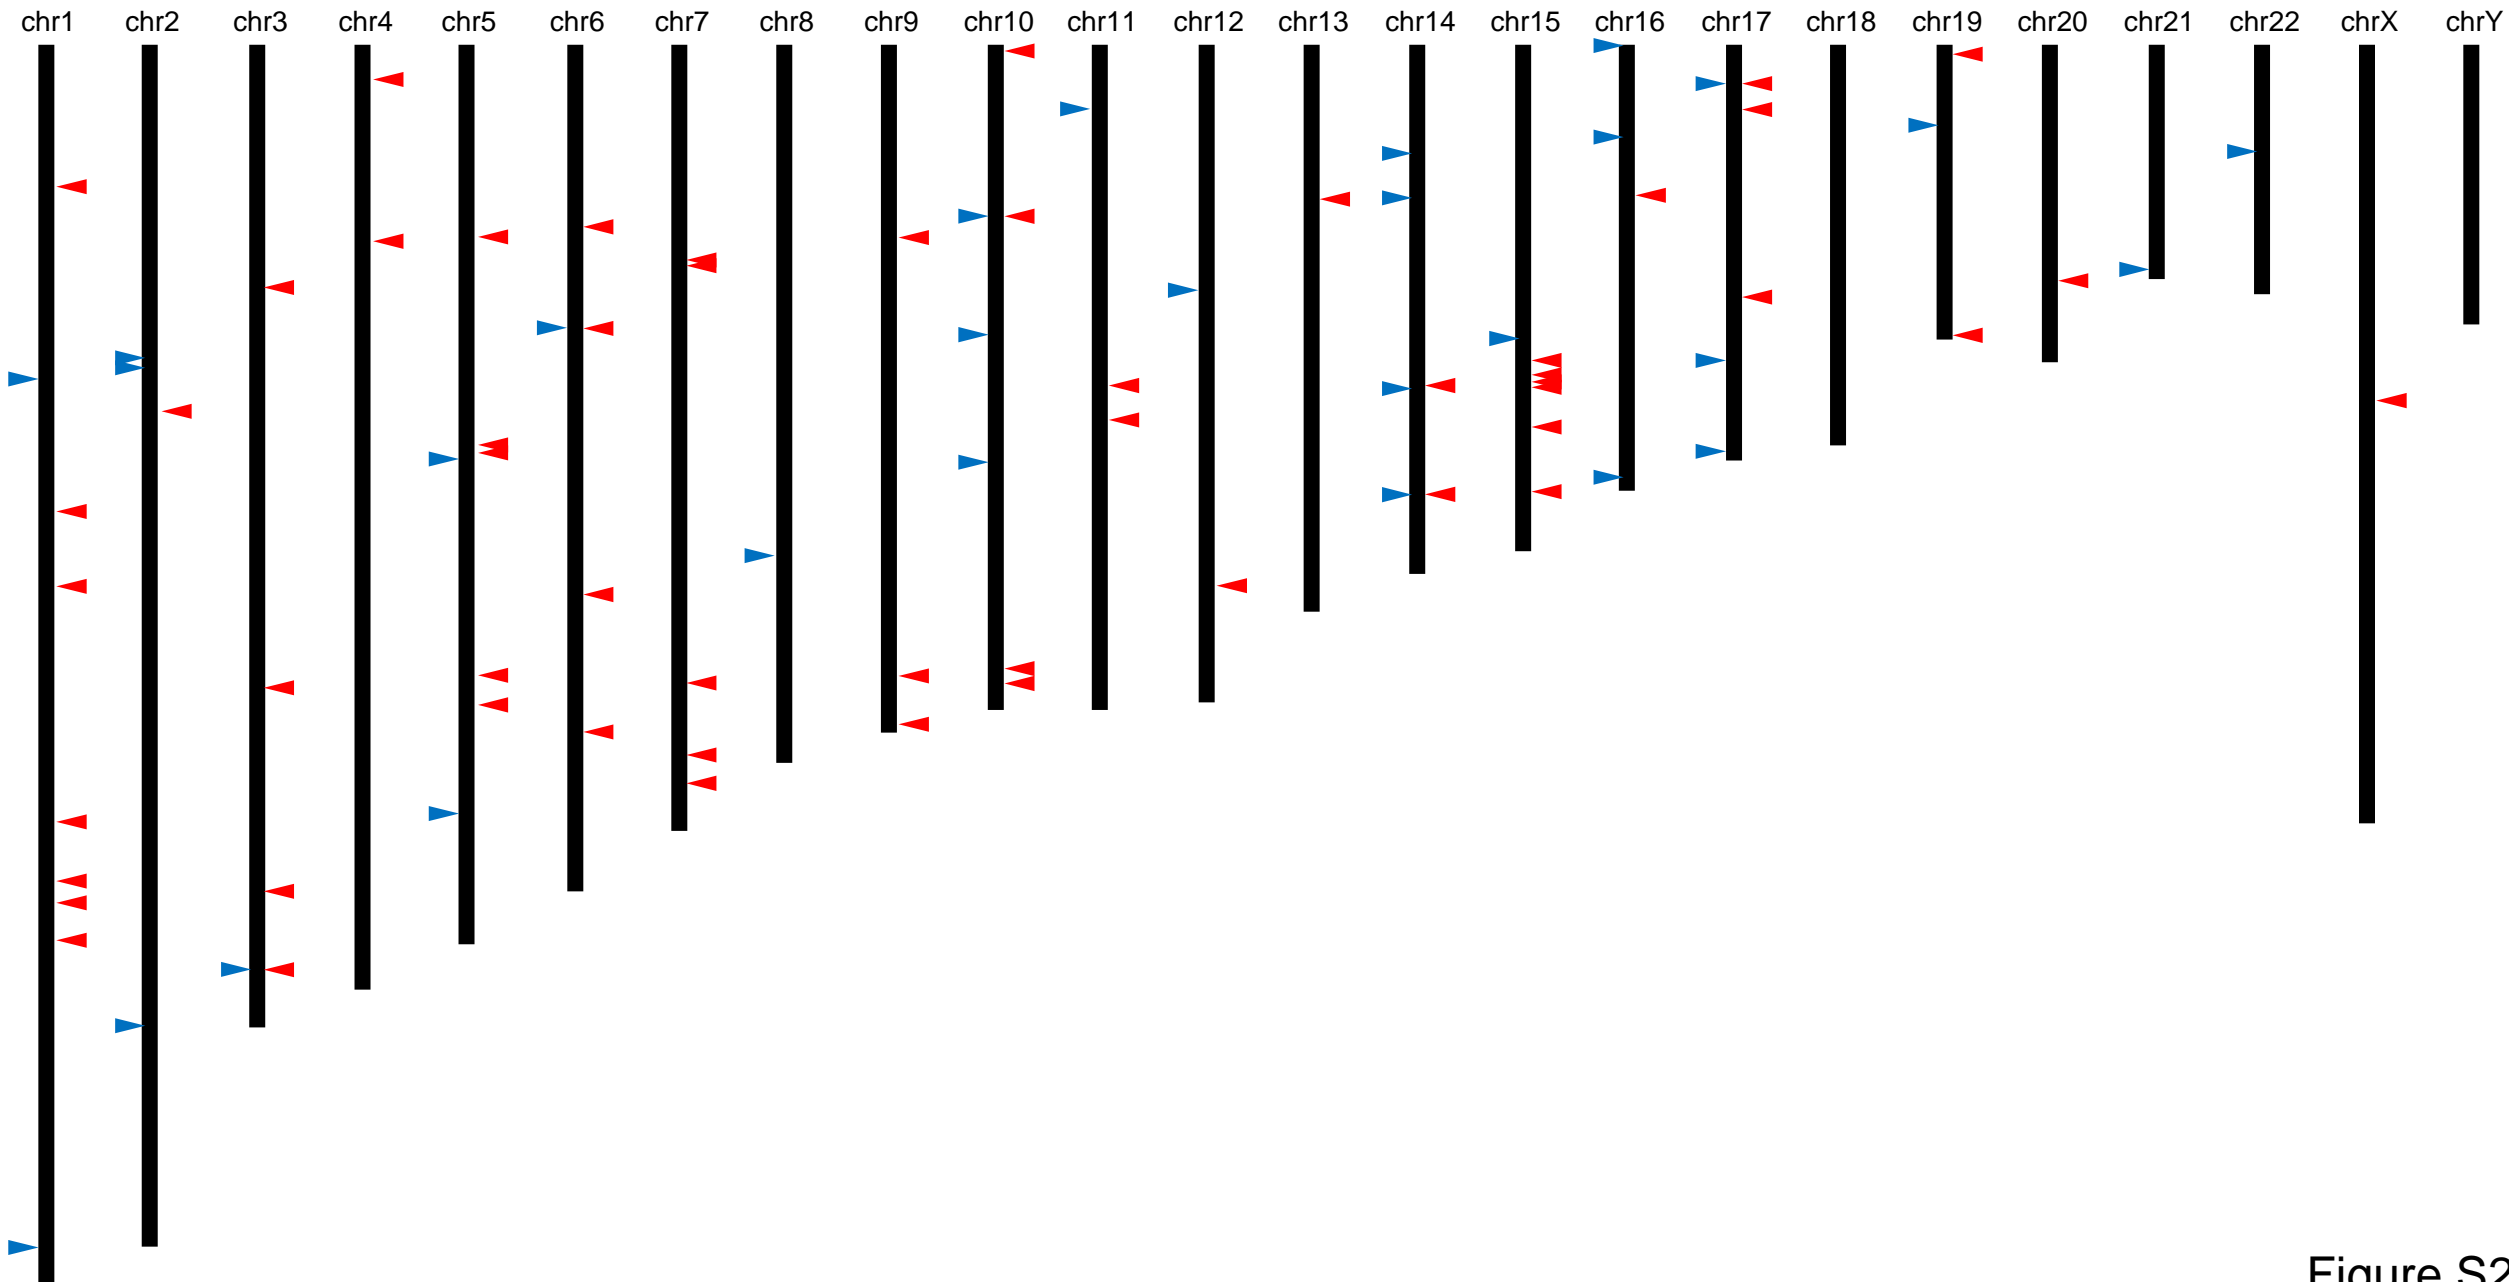

Figure S2

**Fig. S2.** Chromosomal positions of the genes encoding the Y4RNAfr-bound RNAs in A549 cells. Positions of the genes encoding nuclear and cytoplasmic RNAs are indicated by arrowheads on the left and right sides, respectively.
